# Supplementary material
Source: PubMed Central journal article supplement (PMC8763444)
Supplement: 12031_2021_1943_MOESM1_ESM.pdf [file 12031_2021_1943_MOESM1_ESM.pdf]

**Heparan sulfate proteoglycans (HSPGs) serve as the mediator between monomeric tau and its subsequent intracellular ERK1/2 pathway activation**

Liqing Song<sup>1,a</sup>, Daniel E. Oseid<sup>2,a</sup>, Evan A. Wells<sup>1</sup>, Troy Coaston<sup>2</sup>, Anne S. Robinson<sup>1,2</sup>

1. Department of Chemical Engineering, Carnegie Mellon University, Pittsburgh, PA, 15213, USA

2. Tulane Brain Institute, Tulane University, New Orleans LA, 70118, USA

a. These authors contributed equally to this work.

\*corresponding author: Anne S. Robinson, [asrobins@andrew.cmu.edu](mailto:asrobins@andrew.cmu.edu); <https://orcid.org/0000-0001-7235-1481>

**Supplementary Materials**

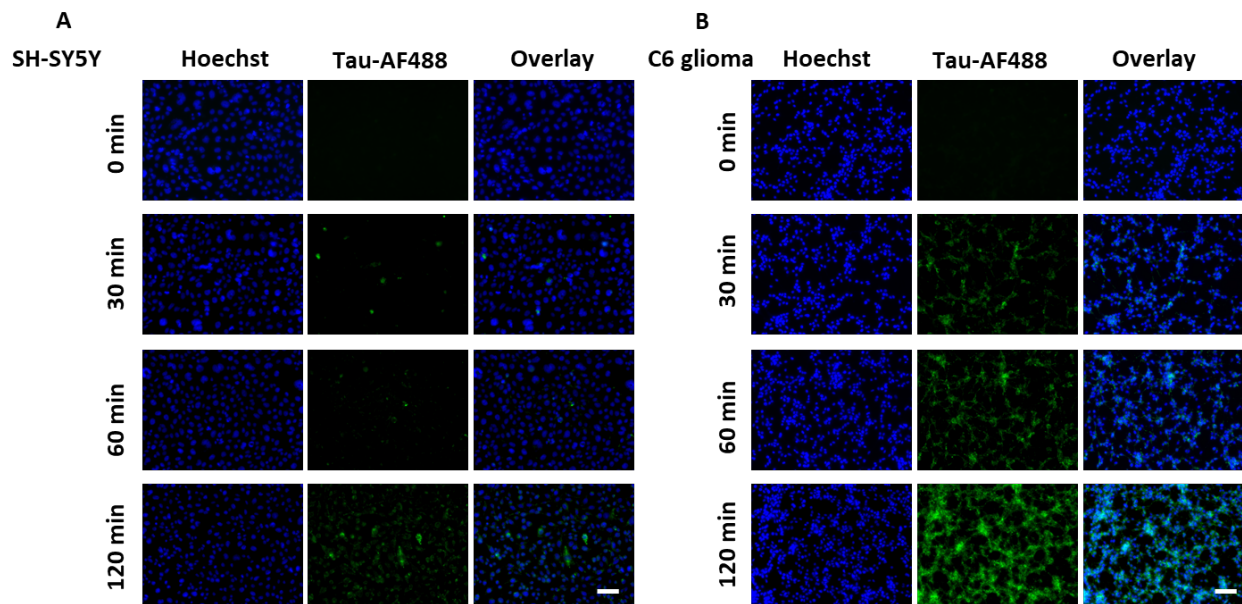

**Fig.S1 C6 glioma cells rapidly take up tau.** The amount of tau-AF488 internalized by both SH-SY5Y cells (**A**) and C6 glioma cells (**B**) increases over time from 0min to 120mins, while SH-SY5Y cells internalize much less tau protein than C6 glioma cells. Scale bar = 100 $\mu$ m.

**A**  
SH-SY5Y

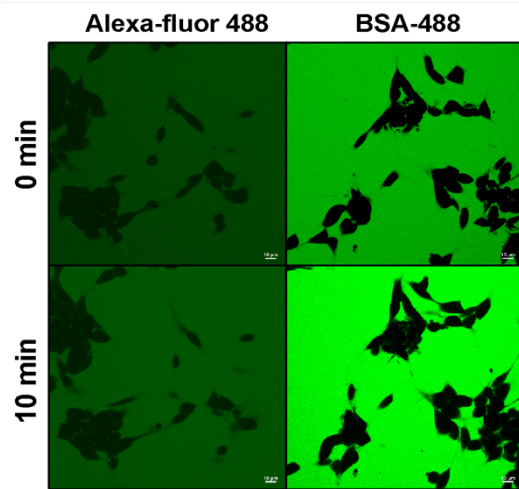

**B**  
C6 glioma

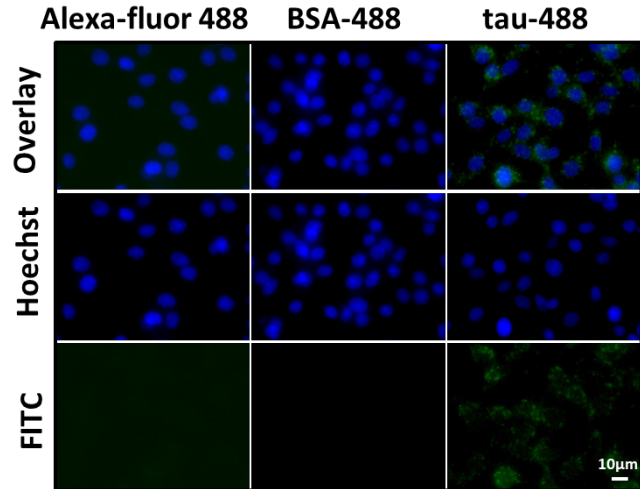

**Fig.S2 No internalization of label or BSA occurs in both SH-SY5Y cells and C6 glioma cells over short imaging periods. (A)** Both free Alexa fluor 488 and labeled BSA remain excluded from SH-SY5Y cells over a ten-minute imaging period. **(B)** Tau-488 primarily localized within cell body of C6 glioma cells after 15mins incubation, while no internalization of free label or BSA was observed.

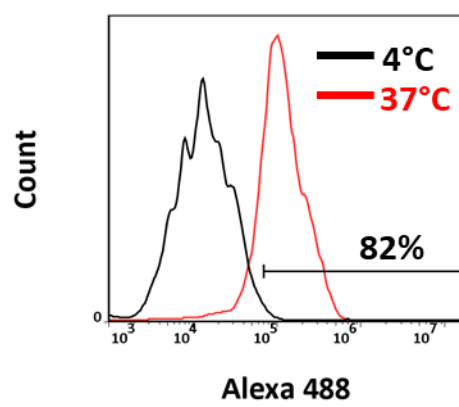

**Fig. S3 The propensity of Alexa Fluor-488-labeled monomeric 0N4R tau uptake was quantified in C6 cells by flow cytometry at different temperatures, 4°C vs. 37°C.** Representative flow cytometry histogram is shown. Black line: cells incubated at 4°C; red line: cells incubated at 37°C.

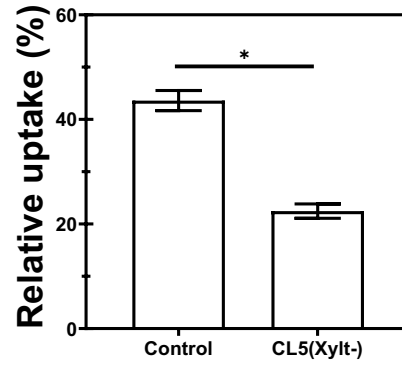

**Fig. S4 HSPG deficiency decreases cellular uptake of tau.** The relative uptake of tau (1µM) was quantified by flow cytometry after a thirty-minute incubation and compared to CL5. (\*Indicates  $p < 0.05$  between different test conditions,  $n=3$ ).

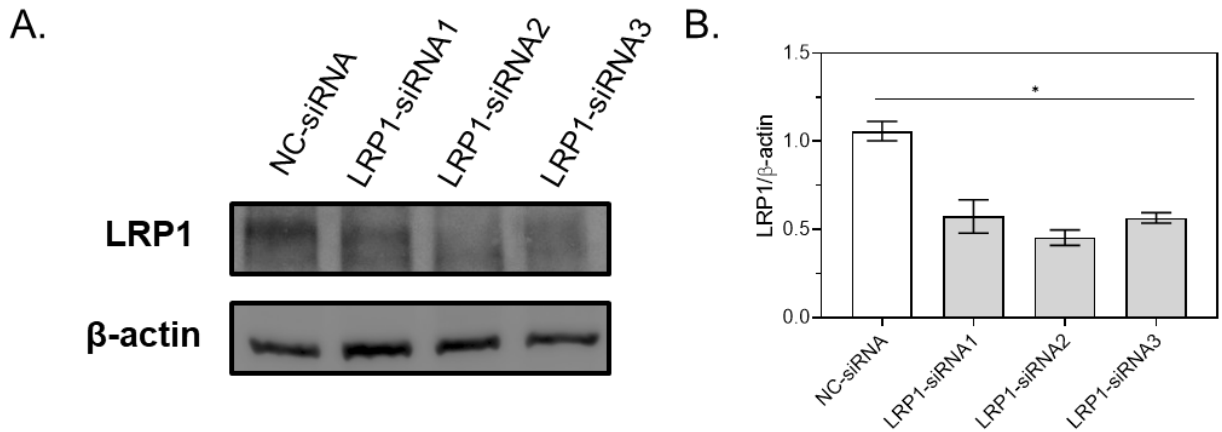

**Fig. S5 Downregulation of LRP1 by transfecting C6 glioma cells with LRP1-specific siRNA.** (A) Rat C6 glioma cells were transiently transfected with non-targeting siRNA (NC) or LRP1-specific siRNA1, siRNA2, and siRNA3 for 48 h. LRP1 downregulation was then evaluated by immunoblotting against LRP1 and  $\beta$ -actin. Quantitative data of LRP1/ $\beta$ -actin ratios from western blot experiments is shown in (B). (\* Indicates  $p < 0.05$  between different test conditions,  $n=3$  biological replicates)

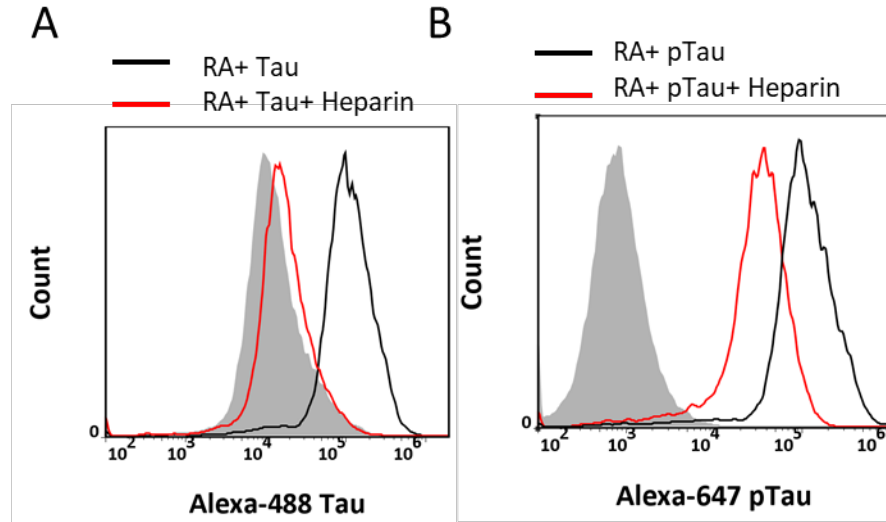

**Fig. S6 Quantification of different tau isoforms uptake by primary astrocytes.** The propensity of Alexa Fluor-488-labeled monomeric 0N4R tau uptake and Alexa Fluor-647-labeled ptau were quantified in primary astrocytes by flow cytometry. Grey filled line: negative control; Black line: cells without heparin; red line: cells with heparin incubation.

**Supplemental Table S1. List of primers for sequencing, sgRNAs and RT-qPCR**

| Name                            | Forward Primer 5' to 3' (F) | Reverse Primer 5' to 3' (R) |
|---------------------------------|-----------------------------|-----------------------------|
| Exon7 sgRNA                     | CACCGAATGTCTATGACGAACCAGA   | AAACTCTGGTTCGTCATAGACATTC   |
| Exon7 Sequencing                | ACAGGTCATGGAGTCCCAGGGC      | GCATCTTGCTCTGCCTGGGACC      |
| <i>Xylt1</i>                    | GACACTGGAGACATGGATGATG      | GTCAGTGCCAACCTCAGAAA        |
| <i>LRP1</i>                     | GGCGTGGTGTCTGGTATAA         | GTAGGTAGGGTTTCCGATTTCC      |
| <i>Il-6</i>                     | GAAGTTAGAGTCACAGAAGGAGTG    | GTTTGCCGAGTAGACCTCATAG      |
| <i>TNF-<math>\alpha</math></i>  | ACCTTATCTACTCCCAGGTTCT      | GGCTGACTTTCTCCTGGTATG       |
| <i>Il-1<math>\beta</math></i>   | CTATGGCAACTGTCCCTGAA        | GGCTTGGAAGCAATCCTTAATC      |
| <i><math>\beta</math>-actin</i> | ACAGGATGCAGAAGGAGATTAC      | ACAGTGAGGCCAGGATAGA         |
